# Supplementary material for: Effectiveness of interprofessional education by on-field training for medical students, with a pre-post design
Source: PubMed Central journal article supplement (PMC4518727; doi:10.1186/s12909-015-0409-z), 2015-07-29
Supplement: 12909_2015_409_MOESM1_ESM.pdf [file 12909_2015_409_MOESM1_ESM.pdf]

**Additional file 1 Frequency of 18 items in IEPS on medical students' pre-post training (n=277)**

| Items                                                                                                                        | Score | 1        | 2         | 3          | 4          | 5          |
|------------------------------------------------------------------------------------------------------------------------------|-------|----------|-----------|------------|------------|------------|
| 1. Individuals in my profession are well-trained.                                                                            | Pre   | 1(0.36)  | 12(4.33)  | 42(15.16)  | 152(54.87) | 70(25.27)  |
|                                                                                                                              | Post  | 2(0.72)  | 6(2.17)   | 38(13.72)  | 131(47.29) | 100(36.10) |
| 2. Individuals in my profession are able to work closely with individuals in other professions .                             | Pre   | 0(0.00)  | 6(2.17)   | 74(36.71)  | 126(45.49) | 71(25.63)  |
|                                                                                                                              | Post  | 0(0.00)  | 2(0.72)   | 46(16.61)  | 152(54.87) | 77(27.80)  |
| 3. Individuals in my profession demonstrate a great deal autonomy.                                                           | Pre   | 3(1.08)  | 24(8.66)  | 115(41.52) | 110(39.71) | 25(9.02)   |
|                                                                                                                              | Post  | 0(0.00)  | 23(8.30)  | 82(29.60)  | 133(48.01) | 39(14.08)  |
| 4. Individuals in other professions respect the work done by my profession.                                                  | Pre   | 0(0.00)  | 10(3.61)  | 73(26.35)  | 156(56.32) | 38(25.27)  |
|                                                                                                                              | Post  | 0(0.00)  | 6(2.17)   | 39(14.08)  | 165(59.57) | 67(24.19)  |
| 5. Individuals in my profession are very positive about their goals and objectives.                                          | Pre   | 0(0.00)  | 3(1.08)   | 58(20.94)  | 159(57.40) | 57(20.58)  |
|                                                                                                                              | Post  | 0(0.00)  | 1(0.36)   | 23(8.30)   | 161(58.12) | 92(33.21)  |
| 6. Individuals in my profession must depend upon the work of people in other professions.                                    | Pre   | 0(0.00)  | 1(0.36)   | 14(5.05)   | 88(31.77)  | 174(62.81) |
|                                                                                                                              | Post  | 1(0.36)  | 0(0.00)   | 4(1.44)    | 70(25.27)  | 202(72.92) |
| 7. Individuals in my profession are very positive about their contributions and accomplishments.                             | Pre   | 0(0.00)  | 2(0.72)   | 24(8.66)   | 155(55.96) | 96(36.66)  |
|                                                                                                                              | Post  | 0(0.00)  | 1(0.36)   | 9(3.25)    | 147(53.07) | 120(43.32) |
| 8. Individuals in my profession must depend upon the work of people in other professions.                                    | Pre   | 0(0.00)  | 14(5.05)  | 62(22.38)  | 125(45.13) | 76(27.44)  |
|                                                                                                                              | Post  | 0(0.00)  | 9(3.25)   | 44(15.88)  | 110(39.71) | 114(41.15) |
| 9. Individuals in other professions think highly of my profession .                                                          | Pre   | 6(2.17)  | 40(14.44) | 164(59.20) | 55(19.85)  | 12(4.33)   |
|                                                                                                                              | Post  | 2(0.72)  | 31(11.19) | 123(44.40) | 106(38.27) | 15(5.41)   |
| 10. Individuals in my profession trust each other' s professional judgment.                                                  | Pre   | 7(2.53)  | 33(11.91) | 138(49.81) | 91(32.85)  | 8(2.89)    |
|                                                                                                                              | Post  | 2(0.72)  | 20(7.22)  | 111(40.07) | 118(42.60) | 26(9.39)   |
| 11. Individuals in my profession have a higher status than individuals in other professions.                                 | Pre   | 22(7.94) | 29(10.47) | 73(26.53)  | 123(44.40) | 30(10.83)  |
|                                                                                                                              | Post  | 23(8.30) | 43(15.52) | 83(29.96)  | 98(35.38)  | 30(10.83)  |
| 12. Individuals in my profession make every effort to understand the capabilities and contributions with other professions . | Pre   | 5(1.80)  | 61(22.02) | 145(52.35) | 56(20.22)  | 10(3.61)   |
|                                                                                                                              | Post  | 3(1.08)  | 48(17.32) | 128(46.21) | 81(29.24)  | 17(6.14)   |
| 13. Individuals in my profession are extremely competent.                                                                    | Pre   | 1(0.36)  | 15(5.41)  | 145(52.35) | 99(35.74)  | 17(6.14)   |
|                                                                                                                              | Post  | 0(0.00)  | 3(1.08)   | 99(35.74)  | 141(50.90) | 34(12.27)  |
| 14. Individuals in my profession are willing to share information and resources with other professionals.                    | Pre   | 0(0.00)  | 20(7.22)  | 133(48.01) | 98(35.38)  | 26(9.39)   |
|                                                                                                                              | Post  | 0(0.00)  | 12(4.33)  | 69(24.91)  | 138(49.82) | 58(20.94)  |
| 15. Individuals in my profession have good relations with people in other professions.                                       | Pre   | 1(0.36)  | 12(4.33)  | 146(52.71) | 99(35.74)  | 19(6.86)   |
|                                                                                                                              | Post  | 0(0.00)  | 10(3.61)  | 61(22.02)  | 148(53.43) | 58(20.94)  |
| 16. Individuals in my profession think highly of other related professions.                                                  | Pre   | 3(1.08)  | 28(10.11) | 143(51.62) | 83(29.96)  | 20(7.22)   |
|                                                                                                                              | Post  | 0(0.00)  | 12(4.33)  | 94(33.93)  | 136(49.10) | 35(12.63)  |
| 17. Individuals in my profession work well with each other.                                                                  | Pre   | 0(0.00)  | 14(5.05)  | 134(48.37) | 109(39.35) | 20(7.22)   |
|                                                                                                                              | Post  | 2(0.72)  | 5(1.80)   | 67(24.19)  | 164(59.20) | 39(14.08)  |
| 18. Individuals in my profession often seek the advice of people in my profession.                                           | Pre   | 0(0.00)  | 16(5.78)  | 112(40.43) | 124(44.76) | 25(9.02)   |
|                                                                                                                              | Post  | 0(0.00)  | 11(3.97)  | 70(25.27)  | 152(54.87) | 44(15.88)  |
